# Supplementary material for: Landscape Influences on Headwater Streams on Fort Stewart, Georgia, USA
Source: Springer Nature journal article supplement (doi:10.1007/s00267-011-9722-4), 2011-07-16
Supplement: MOESM1 [file 5188300]

**Electronic supplement I.**

**<TN>**Table S1. <TC>List frame of accessible headwater watersheds on Fort Stewart and subsets representing those sampleda

| Watershed id (Laboratory id) | History code | Stratum | Training area | Road density (ha) | Barren (%) | Wetland (%) | Grass (%) | Forest (%) | Months since burn | Area (ha) | # Base (Event) |
| --- | --- | --- | --- | --- | --- | --- | --- | --- | --- | --- | --- |
| 64 (1) | 3 | 2 | F-13 | 12.9446 | 0 | 49 | 12 | 34 | 19 | 164 | 2(2) |
| 66 | 0 | 0 | F-12 | 23.7424 | 0 | 15 | 21 | 49 | 23 | 390 |  |
| 69 | 0 | 0 | F-12 | 48.8100 | 0 | 14 | 17 | 54 | 25 | 137 |  |
| 96 (2) | 3 | 0 | F-12 | 31.2324 | 0 | 9 | 33 | 46 | 26 | 105 | 2(1) |
| 101 | 0 | 2 | F-19 | 9.1005 | 0 | 36 | 7 | 54 | 28 | 264 |  |
| 115 (5) | 1 | 2 | F-19 | 16.0025 | 0 | 30 | 3 | 58 | 37 | 227 | 1(2) |
| 117 | 0 | 2 | F-15 | 21.9184 | 0 | 30 | 8 | 50 | 24 | 256 |  |
| 141 | 0 | 2 | F-18 | 12.9515 | 0 | 29 | 4 | 62 | 35 | 199 |  |
| 147 | 0 | 1 | F-19 | 20.1080 | 4 | 28 | 36 | 20 | 30 | 114 |  |
| 186 | 0 | 3 | F-16 | 10.5175 | 0 | 13 | 3 | 80 | 34 | 111 |  |
| 199 (3) | 3 | 3 | F-6 | 13.7667 | 0 | 12 | 7 | 79 | 27 | 249 | 2(3) |
| 216 | 2 | 0 | C-1 | 16.9245 | 0 | 24 | 10 | 58 | 26 | 436 |  |
| 218 (4) | 3 | 3 | F-6 | 17.4024 | 0 | 12 | 1 | 82 | 21 | 126 | 3(3) |
| 244 | 0 | 2 | B-12 | 9.5701 | 0 | 49 | 21 | 23 | 9 | 175 |  |
| 255 | 0 | 3 | F-8 | 22.4441 | 0 | 5 | 3 | 85 | 25 | 144 |  |
| 281 | 2 | 3 | B-19 | 27.2529 | 0 | 5 | 7 | 79 | 25 | 110 |  |
| 298 | 0 | 0 | E-19 | 25.1825 | 0 | 18 | 15 | 55 | 25 | 110 |  |
| 327 (20B) | 3 | 3 | F-4 | 11.0074 | 0 | 20 | 1 | 76 | 42 | 202 | 2(2) |
| 334 | 2 | 2 | C-14 | 12.0085 | 0 | 29 | 4 | 64 | 32 | 243 |  |
| 339 (16) | 3 | 1 | E-19 | 26.3872 | 5 | 17 | 33 | 26 | 28 | 297 | 2(1) |
| 347 (6) | 1 | 1 | F-4 | 23.9496 | 2 | 12 | 8 | 71 | 43 | 163 | 3(2) |
| 348 | 2 | 1 | B-19 | 20.9766 | 5 | 11 | 7 | 71 | 36 | 121 |  |
| 362 | 2 | 2 | B-19 | 8.6118 | 0 | 27 | 7 | 63 | 36 | 353 |  |
| 364 | 0 | 1 | E-11 | 62.7127 | 23 | 24 | 29 | 5 | 29 | 160 |  |
| 379 (17) | 3 | 1 | E-16 | 56.0612 | 3 | 21 | 20 | 43 | 25 | 240 | 2(3) |
| 385 (20A) | 1 | 3 | F-2 | 26.0140 | 0 | 8 | 8 | 77 | 34 | 130 | 0(1) |
| 386 (19) | 3 | 1 | F-2 | 43.8582 | 2 | 12 | 10 | 59 | 27 | 128 | 2(3) |
| 388 (9B) | 1 | 3 | F-3 | 12.4118 | 0 | 9 | 4 | 83 | 51 | 259 | 2(3) |
| 401 (13) | 3 | 0 | E-16 | 0.1292 | 0 | 23 | 7 | 67 | 24 | 124 | 2(3) |
| 423 | 0 | 2 | E-16 | 17.9836 | 0 | 29 | 17 | 46 | 25 | 253 |  |
| 433 | 0 | 0 | F-1 | 28.9074 | 0 | 21 | 9 | 58 | 21 | 109 |  |
| 440 (14) | 3 | 2 | E-16 | 28.0448 | 0 | 29 | 16 | 50 | 20 | 269 | 2(3) |
| 504 (7) | 3 | 3 | F-2 | 6.9816 | 0 | 25 | 1 | 72 | 25 | 470 | 1(0) |
| 511 (18) | 3 | 0 | E-14 | 32.4106 | 0 | 24 | 14 | 54 | 26 | 461 | 2(3) |
| 526 (12) | 3 | 2 | E-14 | 22.1880 | 0 | 29 | 12 | 54 | 21 | 271 | 3(3) |
| 555 (11B) | 3 | 0 | E-6 | 24.7788 | 0 | 25 | 4 | 65 | 27 | 222 | 2(2) |
| 556 | 2 | 1 | B-8 | 27.0620 | 1 | 10 | 3 | 76 | 36 | 149 |  |
| 559 | 0 | 2 | E-13 | 35.4104 | 0 | 25 | 10 | 55 | 24 | 200 |  |
| 561 | 0 | 2 | E-7 | 28.3344 | 0 | 29 | 0 | 63 | 22 | 104 |  |
| 565 (15) | 1 | 2 | E-13 | 1.9474 | 0 | 34 | 10 | 56 | 21 | 174 | 2(3) |
| 569 | 0 | 1 | B-8 | 26.6425 | 2 | 7 | 16 | 65 | 29 | 132 |  |
| 588 | 2 | 3 | E-13 | 42.5639 | 0 | 16 | 1 | 71 | 22 | 111 |  |
| 592 | 0 | 0 | B-8 | 19.2748 | 0 | 20 | 15 | 56 | 21 | 415 |  |
| 595 | 2 | 0 | E-7 | 34.9800 | 0 | 24 | 6 | 63 | 29 | 498 |  |
| 602 (8) | 3 | 2 | E-3 | 3.2632 | 0 | 25 | 1 | 73 | 36 | 143 | 2(3) |
| 604 (10) | 3 | 0 | E-7 | 49.3029 | 0 | 10 | 6 | 67 | 25 | 364 | 0(1) |
| 617 | 2 | 1 | E-3 | 8.1777 | 11 | 24 | 19 | 43 | 33 | 136 |  |
| 619 | 0 | 0 | E-4 | 17.4304 | 0 | 23 | 2 | 69 | 32 | 338 |  |
| 625 (11A) | 3 | 0 | E-3 | 43.5642 | 0 | 16 | 1 | 63 | 31 | 122 | 1(1) |
| 643 (9A) | 1 | 3 | E-3 | 24.1218 | 0 | 10 | 1 | 76 | 32 | 226 | 2(3) |

<TFN>aLaboratory IDs in column 1 with “A”-appended indicate sites replaced after 2008, and replacement sites are “B”-appended. History codes indicate headwater accessible watersheds in the list frame: 0 = not in candidate sample, not sampled; 1 = not in candidate sample, sampled; 2 = candidate sample, not sampled (excluded during site visit); and 3 = candidate sample, sampled.
